# Supplementary figures and images for: Ca2+-Calcineurin-NFAT pathway mediates the effect of thymol on oxidative metabolism and fiber-type switch in skeletal muscle
Source: Royal Society of Chemistry journal article supplement (doi:10.1039/c8fo02248h), 2019-01-01

**A**

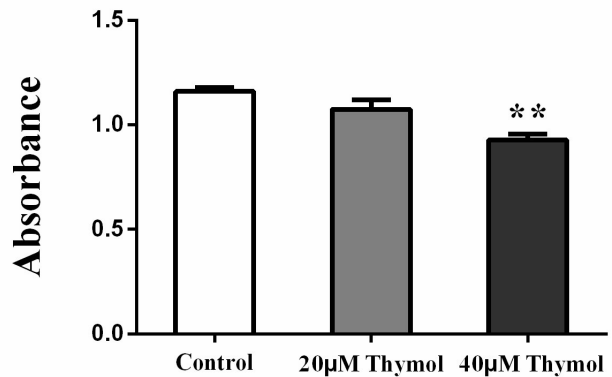

**B**

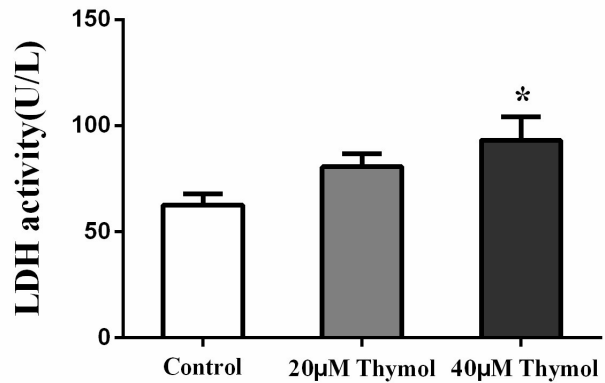

Supplement: c8fo02248h1.pdf [file c8fo02248h1.pdf]

**A**

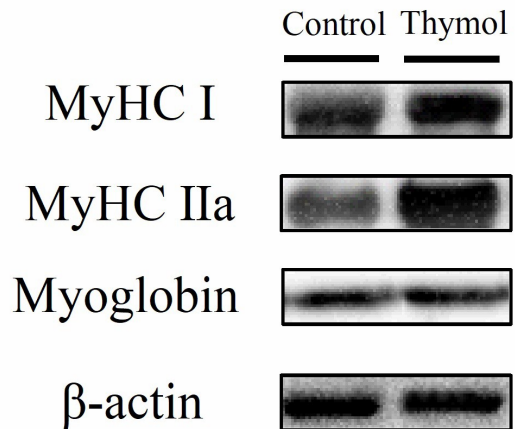

**B**

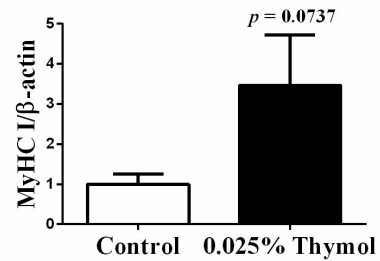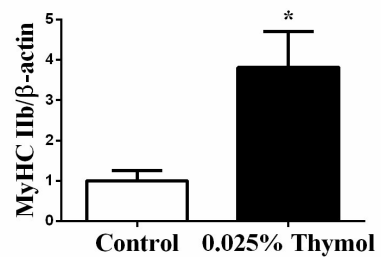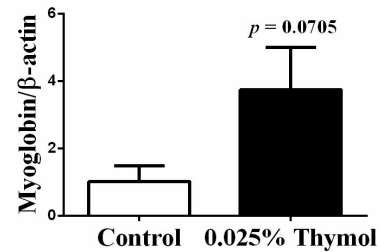

Supplement: c8fo02248h3.pdf [file c8fo02248h3.pdf]
